# Supplementary material for: Investigating the Role of Communication for Information Seekers’ Trust-Related Evaluations of Health Videos on the Web: Content Analysis, Survey Data, and Experiment
Source: PubMed Central journal article supplement (PMC6322917; doi:10.2196/10282), 2018-12-21
Supplement: ijmr_v7i2e10282_app1.pdf [file ijmr_v7i2e10282_app1.pdf]

## Description of Videos for Content Analysis

Table 1

Descriptive values of video search

| platform | Search term | N (%) | sex of voice       |
|----------|-------------|-------|--------------------|
| YouTube  | “health”    | 11    | 18 female/7 male   |
|          | “diet”      | 14    |                    |
|          | Total       | 25    |                    |
| Vimeo    | “health”    | 9     | 2 female/9 male    |
|          | “diet”      | 2     |                    |
|          | Total       | 11    |                    |
| Total    |             | 36    | 21 female /16 male |

*Note.* Overall 200 videos (50 per search term) were judged whether they are going to be analyzed or excluded because of previously determined criteria.

Table 2

## Overview of all transcribed videos

| Platform | Search Term | Original rank of video | Presence of a protagonist      | Duration time                                                                 | Declared/apparent topic/aim of video                                                                  | Video (Titel, Link)                                                                                   |
|----------|-------------|------------------------|--------------------------------|-------------------------------------------------------------------------------|-------------------------------------------------------------------------------------------------------|-------------------------------------------------------------------------------------------------------|
| Vimeo    | diet        | 17.                    | Yes                            | 4.52                                                                          | „Diet: The Disease of our Generation“                                                                 | <a href="https://vimeo.com/112832255">https://vimeo.com/112832255</a>                                 |
|          |             | 22.                    | Yes                            | 6.49                                                                          | „The Fat Diet“                                                                                        | <a href="https://vimeo.com/72150860">https://vimeo.com/72150860</a>                                   |
|          | health      | 4.                     | No                             | 1.03                                                                          | „Men’s Health // How a Bean Becomes a Fart“                                                           | <a href="https://vimeo.com/103721959">https://vimeo.com/103721959</a>                                 |
|          |             | 5.                     | No                             | 1.56                                                                          | „ CRC Health Group: Health & Welfare“                                                                 | <a href="https://vimeo.com/32216194">https://vimeo.com/32216194</a>                                   |
|          |             | 6.                     | No                             | 0.30                                                                          | „ Dignity Health “                                                                                    | <a href="https://vimeo.com/155463374">https://vimeo.com/155463374</a>                                 |
|          |             | 24.                    | No                             | 1.20                                                                          | „ Beer Goggles Explained - Men’s Health “                                                             | <a href="https://vimeo.com/91322930">https://vimeo.com/91322930</a>                                   |
|          |             | 25.                    | Yes                            | 3.27                                                                          | „ Sugar - Health Nuts“                                                                                | <a href="https://vimeo.com/44273084">https://vimeo.com/44273084</a>                                   |
|          |             | 29.                    | No                             | 1.41                                                                          | „Total Health Care   Affordable Care Act FAQ“                                                         | <a href="https://vimeo.com/92149026">https://vimeo.com/92149026</a>                                   |
|          |             | 36.                    | No                             | 1.19                                                                          | „ How High BP Causes a Stroke / Men’s Health Magazine “                                               | <a href="https://vimeo.com/97006830">https://vimeo.com/97006830</a>                                   |
|          |             | 48.                    | Yes                            | 4.06                                                                          | „ Rastovich’s Yoga Routine - Health Nuts“                                                             | <a href="https://vimeo.com/14492968">https://vimeo.com/14492968</a>                                   |
| 49.      | Yes         | 3.25                   | „Sunburn Basics - Health Nuts“ | <a href="https://vimeo.com/41601463">https://vimeo.com/41601463</a>           |                                                                                                       |                                                                                                       |
| YouTube  | diet        | 5.                     | Yes                            | 3.12                                                                          | „Easy Diet Hack + My #1 Healthy Snack Idea ♥ Easy Diet Tips ♥ Wengie ♥“                               | <a href="https://www.youtube.com/watch?v=owMzIgGpk94">https://www.youtube.com/watch?v=owMzIgGpk94</a> |
| 6.       |             | Yes                    | 9.37                           | „10 CRAZIEST Diet Trends EVER“                                                | <a href="https://www.youtube.com/watch?v=S27THWdOxss">https://www.youtube.com/watch?v=S27THWdOxss</a> |                                                                                                       |
| 7.       |             | Yes                    | 3.01                           | „What I Eat In a Day: Elimination Diet“                                       | <a href="https://www.youtube.com/watch?v=acVD0n7Sd80">https://www.youtube.com/watch?v=acVD0n7Sd80</a> |                                                                                                       |
| 8.       |             | No                     | 2.27                           | „Exercise vs Diet“                                                            | <a href="https://www.youtube.com/watch?v=ztiHRiFXtoc">https://www.youtube.com/watch?v=ztiHRiFXtoc</a> |                                                                                                       |
| 9.       |             | Yes                    | 9.01                           | „3 day Military Diet“                                                         | <a href="https://www.youtube.com/watch?v=YQhoQUxap6o">https://www.youtube.com/watch?v=YQhoQUxap6o</a> |                                                                                                       |
| 10.      |             | Yes                    | 7.13                           | „HOW TO GET HEALTHY! My Diet Tips“                                            | <a href="https://www.youtube.com/watch?v=VJrsjUY4PGI">https://www.youtube.com/watch?v=VJrsjUY4PGI</a> |                                                                                                       |
| 12.      |             | Yes                    | 7.57                           | „HOW TO LOSE 10 POUNDS IN 3 DAYS   Military Diet, Does It Really Work? *NEW*“ | <a href="https://www.youtube.com/watch?v=L4Ev17To2XY">https://www.youtube.com/watch?v=L4Ev17To2XY</a> |                                                                                                       |
| 14.      |             | No                     | 3.25                           | „HOW TO LOSE WEIGHT FAST 10Kg in 10 Days“                                     | <a href="https://www.youtube.com/watch?v=aGtwMA5_mUo">https://www.youtube.com/watch?v=aGtwMA5_mUo</a> |                                                                                                       |
| 15.      |             | Yes                    | 6.19                           | „Diet to Lose Weight   What I Eat In A Day   Burn Fats Diet“                  | <a href="https://www.youtube.com/watch?v=AiCnERkm2Jw">https://www.youtube.com/watch?v=AiCnERkm2Jw</a> |                                                                                                       |
| 24.      |             | Yes                    | 9.10                           | „How I Lost 10 Pounds + Diet Tips“                                            | <a href="https://www.youtube.com/watch?v=Ci0gjKhImCo">https://www.youtube.com/watch?v=Ci0gjKhImCo</a> |                                                                                                       |
| 31.      |             | Yes                    | 4.03                           | „The Military Diet: How To Lose 10 Pounds in 3 Days“                          | <a href="https://www.youtube.com/watch?v=Ht-UV3nutgM">https://www.youtube.com/watch?v=Ht-UV3nutgM</a> |                                                                                                       |
| 36.      |             | Yes                    | 8.44                           | „My Fitness Routine   Diet, Exercise & More!“                                 | <a href="https://www.youtube.com/watch?v=bh9XVnSIUpY">https://www.youtube.com/watch?v=bh9XVnSIUpY</a> |                                                                                                       |
| 46.      |             | Yes                    | 7.43                           | „THE MILITARY DIET: does it really work? find out how much weight I lost!“    | <a href="https://www.youtube.com/watch?v=eUpG91E50_k">https://www.youtube.com/watch?v=eUpG91E50_k</a> |                                                                                                       |
| 49.      |             | Yes                    | 4.56                           | „My Healthy Diet Routine: Get Slim For Summer! + School Lunch & Snack Ideas!“ | <a href="https://www.youtube.com/watch?v=c5vEbjBXHwg">https://www.youtube.com/watch?v=c5vEbjBXHwg</a> |                                                                                                       |
| YouTube  | health      | 3.                     | Yes                            | 4.36                                                                          | „Tips for a healthy lifestyle“                                                                        | <a href="https://www.youtube.com/watch?v=0aNNYEUARAK">https://www.youtube.com/watch?v=0aNNYEUARAK</a> |
|          |             | 4.                     | Yes                            | 3.48                                                                          | „ What Your Lip Color Says About                                                                      | <a href="https://www.youtube.com/watch?">https://www.youtube.com/watch?</a>                           |

|     |     |      | Your Health “                                                                                   | v=_BKPqICyn9s                                                                                         |
|-----|-----|------|-------------------------------------------------------------------------------------------------|-------------------------------------------------------------------------------------------------------|
| 5.  | Yes | 6.56 | „ 10 Health Myths People Still Believe”                                                         | <a href="https://www.youtube.com/watch?v=-rISIRTYmQ8">https://www.youtube.com/watch?v=-rISIRTYmQ8</a> |
| 6.  | Yes | 5.05 | „ Health & Fitness Life Hacks!”                                                                 | <a href="https://www.youtube.com/watch?v=VNy31THi7i8">https://www.youtube.com/watch?v=VNy31THi7i8</a> |
| 9.  | Yes | 4.19 | „ What is Exposure Therapy? PTSD, Anxiety, OCD and more... Mental Health Help with Kati Morton” | <a href="https://www.youtube.com/watch?v=mlJy85EQrCI">https://www.youtube.com/watch?v=mlJy85EQrCI</a> |
| 15. | No  | 4.01 | “Women's Pelvic Health: 1 Female Reproductive Anatomy”                                          | <a href="https://www.youtube.com/watch?v=4P4nMQixnHY">https://www.youtube.com/watch?v=4P4nMQixnHY</a> |
| 19. | Yes | 8.42 | “Fitness & Health Motivation, Life Hacks + DIY Inspiration Board”                               | <a href="https://www.youtube.com/watch?v=zES85siew4c">https://www.youtube.com/watch?v=zES85siew4c</a> |
| 27. | Yes | 3.40 | „Health News in Brief 25 JUL 2016 (Beta)“                                                       | <a href="https://www.youtube.com/watch?v=HQIFoeA_ga0">https://www.youtube.com/watch?v=HQIFoeA_ga0</a> |
| 31. | Yes | 4.03 | „ 5 Things Your Nails Can Say About Your Health“                                                | <a href="https://www.youtube.com/watch?v=aTSVHwzkYI4">https://www.youtube.com/watch?v=aTSVHwzkYI4</a> |
| 34. | No  | 5.10 | „How do carbohydrates impact your health? - Richard J. Wood”                                    | <a href="https://www.youtube.com/watch?v=wxzc_2c6GMg">https://www.youtube.com/watch?v=wxzc_2c6GMg</a> |
| 45. | No  | 3.24 | “Men health animation”                                                                          | <a href="https://www.youtube.com/watch?v=LgmZsitCS1U">https://www.youtube.com/watch?v=LgmZsitCS1U</a> |
