# Supplementary material for: Investigating the Role of Communication for Information Seekers’ Trust-Related Evaluations of Health Videos on the Web: Content Analysis, Survey Data, and Experiment
Source: PubMed Central journal article supplement (PMC6322917; doi:10.2196/10282), 2018-12-21
Supplement: ijmr_v7i2e10282_app3.pdf [file ijmr_v7i2e10282_app3.pdf]

**Screenshots of experimental videos being embedded within a screenshot that showed the interface of either Moodle or YouTube**

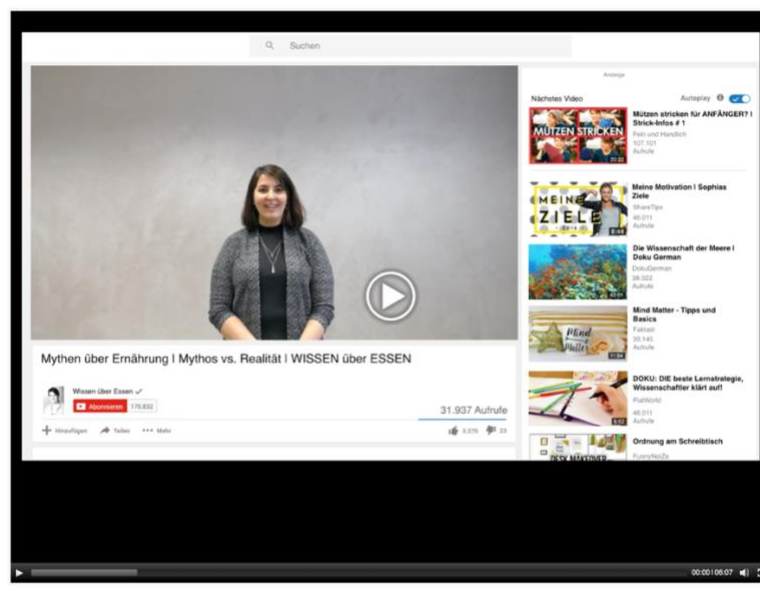

*Figure 1.* Video about nutrition myths being embedded within a screenshot that showed YouTube.

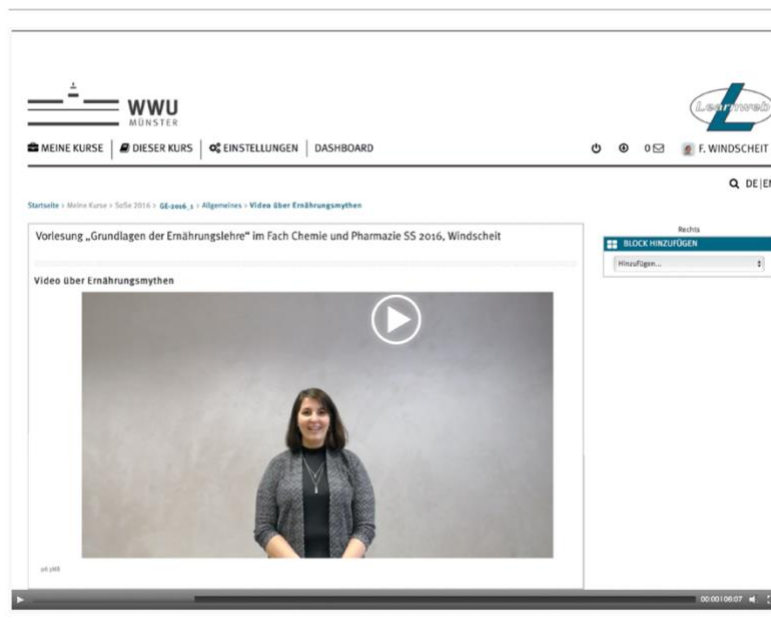

*Figure 2.* Video about nutrition myths being embedded within a screenshot that showed Moodle.

For videos and transcribed texts, please refer to <https://drive.google.com/drive/folders/1j8poFJ3swpaZdRZOXGt7njmry3Nfz7FC?usp=sharing>
