# Supplementary material for: Investigating the Role of Communication for Information Seekers’ Trust-Related Evaluations of Health Videos on the Web: Content Analysis, Survey Data, and Experiment
Source: PubMed Central journal article supplement (PMC6322917; doi:10.2196/10282), 2018-12-21
Supplement: ijmr_v7i2e10282_app4.pdf [file ijmr_v7i2e10282_app4.pdf]

|                        |                 |       |         |       |       |       |       |        |         |         |         |         |        |        |
|------------------------|-----------------|-------|---------|-------|-------|-------|-------|--------|---------|---------|---------|---------|--------|--------|
| benevolence            | N               | 124   | 124     | 124   | 123   | 124   | 124   | 124    | 124     | 124     | 124     | 124     | 124    | 124    |
| ROS SCORE              | Pearson corr.   | -,118 | -,200*  | -,062 | -,037 | ,029  | ,092  | ,412** | -,534** | -,490** | -,493** | -,407** | 1      | ,933** |
|                        | Sign. (2-sided) | ,191  | ,026    | ,492  | ,687  | ,748  | ,307  | ,000   | ,000    | ,000    | ,000    | ,000    |        | ,000   |
|                        | N               | 124   | 124     | 124   | 123   | 124   | 124   | 124    | 124     | 124     | 124     | 124     | 124    | 124    |
| ROS audience design    | Pearson corr.   | -,123 | -,163   | -,069 | -,035 | ,071  | ,040  | ,300** | -,441** | -,344** | -,442** | -,408** | ,933** | 1      |
|                        | Sign. (2-sided) | ,172  | ,071    | ,447  | ,702  | ,432  | ,661  | ,001   | ,000    | ,000    | ,000    | ,000    | ,000   |        |
|                        | N               | 124   | 124     | 124   | 123   | 124   | 124   | 124    | 124     | 124     | 124     | 124     | 124    | 124    |
| ROS evaluation         | Pearson corr.   | -,063 | -,231** | -,006 | ,002  | -,117 | ,108  | ,460** | -,559** | -,642** | -,446** | -,271** | ,771** | ,536** |
|                        | Sign. (2-sided) | ,486  | ,010    | ,943  | ,984  | ,195  | ,234  | ,000   | ,000    | ,000    | ,000    | ,002    | ,000   | ,000   |
|                        | N               | 124   | 124     | 124   | 123   | 124   | 124   | 124    | 124     | 124     | 124     | 124     | 124    | 124    |
| ROS subj comprehension | Pearson corr.   | -,073 | -,017   | -,083 | -,082 | ,160  | ,135  | ,197*  | -,153   | -,080   | -,168   | -,194*  | ,498** | ,392** |
|                        | Sign. (2-sided) | ,423  | ,848    | ,362  | ,367  | ,076  | ,136  | ,028   | ,089    | ,374    | ,062    | ,031    | ,000   | ,000   |
|                        | N               | 124   | 124     | 124   | 123   | 124   | 124   | 124    | 124     | 124     | 124     | 124     | 124    | 124    |
| Coffee credibility     | Pearson corr.   | ,158  | ,071    | ,098  | ,028  | -,165 | ,079  | ,533** | -,432** | -,438** | -,353** | -,303** | ,461** | ,366** |
|                        | Sign. (2-sided) | ,079  | ,434    | ,276  | ,756  | ,067  | ,381  | ,000   | ,000    | ,000    | ,000    | ,001    | ,000   | ,000   |
|                        | N               | 124   | 124     | 124   | 123   | 124   | 124   | 124    | 124     | 124     | 124     | 124     | 124    | 124    |
| Cola credibility       | Pearson corr.   | ,036  | ,111    | ,130  | -,003 | -,024 | ,088  | ,517** | -,431** | -,433** | -,357** | -,303** | ,303** | ,206*  |
|                        | Sign. (2-sided) | ,695  | ,219    | ,150  | ,972  | ,791  | ,330  | ,000   | ,000    | ,000    | ,000    | ,001    | ,001   | ,022   |
|                        | N               | 124   | 124     | 124   | 123   | 124   | 124   | 124    | 124     | 124     | 124     | 124     | 124    | 124    |
| Light credibility      | Pearson corr.   | ,093  | ,144    | ,149  | ,026  | -,030 | ,125  | ,442** | -,345** | -,366** | -,300** | -,197*  | ,439** | ,354** |
|                        | Sign. (2-sided) | ,306  | ,111    | ,098  | ,779  | ,743  | ,168  | ,000   | ,000    | ,000    | ,001    | ,029    | ,000   | ,000   |
|                        | N               | 124   | 124     | 124   | 123   | 124   | 124   | 124    | 124     | 124     | 124     | 124     | 124    | 124    |
| Cancer credibility     | Pearson corr.   | ,142  | ,099    | ,052  | ,000  | -,011 | ,052  | ,515** | -,403** | -,422** | -,327** | -,262** | ,301** | ,212*  |
|                        | Sign. (2-sided) | ,115  | ,273    | ,563  | ,996  | ,900  | ,563  | ,000   | ,000    | ,000    | ,000    | ,003    | ,001   | ,018   |
|                        | N               | 124   | 124     | 124   | 123   | 124   | 124   | 124    | 124     | 124     | 124     | 124     | 124    | 124    |
| Salt credibility       | Pearson corr.   | ,054  | -,016   | ,031  | ,031  | -,074 | ,147  | ,467** | -,455** | -,509** | -,373** | -,234** | ,344** | ,246** |
|                        | Sign. (2-sided) | ,554  | ,863    | ,729  | ,731  | ,416  | ,104  | ,000   | ,000    | ,000    | ,000    | ,009    | ,000   | ,006   |
|                        | N               | 124   | 124     | 124   | 123   | 124   | 124   | 124    | 124     | 124     | 124     | 124     | 124    | 124    |
| Eggs credibility       | Pearson corr.   | ,158  | ,056    | ,084  | ,083  | -,048 | -,077 | ,449** | -,566** | -,526** | -,485** | -,456** | ,406** | ,313** |
|                        | Sign. (2-sided) | ,079  | ,537    | ,352  | ,362  | ,596  | ,395  | ,000   | ,000    | ,000    | ,000    | ,000    | ,000   | ,000   |
|                        | N               | 124   | 124     | 124   | 123   | 124   | 124   | 124    | 124     | 124     | 124     | 124     | 124    | 124    |

| Correlations    |                 |                |                        |                               |                  |                             |                    |                  |                  |     |
|-----------------|-----------------|----------------|------------------------|-------------------------------|------------------|-----------------------------|--------------------|------------------|------------------|-----|
|                 |                 | ROS evaluation | ROS subj comprehension | Coffee & Dementia credibility | Cola credibility | Light Beverages credibility | Cancer credibility | Salt credibility | Eggs credibility |     |
| Geschlecht      | Pearson corr.   | -,063          | -,073                  | ,158                          | ,036             | ,093                        | ,142               | ,054             | ,158             |     |
|                 | Sign. (2-sided) | ,486           | ,423                   | ,079                          | ,695             | ,306                        | ,115               | ,554             | ,079             |     |
|                 | N               | 124            | 124                    | 124                           | 124              | 124                         | 124                | 124              | 124              | 124 |
| Alter           | Pearson corr.   | -,231**        | -,017                  | ,071                          | ,111             | ,144                        | ,099               | -,016            | ,056             |     |
|                 | Sign. (2-sided) | ,010           | ,848                   | ,434                          | ,219             | ,111                        | ,273               | ,863             | ,537             |     |
|                 | N               | 124            | 124                    | 124                           | 124              | 124                         | 124                | 124              | 124              | 124 |
| Computernutzung | Pearson corr.   | -,006          | -,083                  | ,098                          | ,130             | ,149                        | ,052               | ,031             | ,084             |     |

|                               |                 |         |        |         |         |         |         |         |         |
|-------------------------------|-----------------|---------|--------|---------|---------|---------|---------|---------|---------|
|                               | Sign. (2-sided) | ,943    | ,362   | ,276    | ,150    | ,098    | ,563    | ,729    | ,352    |
|                               | N               | 124     | 124    | 124     | 124     | 124     | 124     | 124     | 124     |
| Internetnutzung               | Pearson corr.   | ,002    | -,082  | ,028    | -,003   | ,026    | ,000    | ,031    | ,083    |
|                               | Sign. (2-sided) | ,984    | ,367   | ,756    | ,972    | ,779    | ,996    | ,731    | ,362    |
|                               | N               | 123     | 123    | 123     | 123     | 123     | 123     | 123     | 123     |
| Online_gesamtnutzung          | Pearson corr.   | -,117   | ,160   | -,165   | -,024   | -,030   | -,011   | -,074   | -,048   |
|                               | Sign. (2-sided) | ,195    | ,076   | ,067    | ,791    | ,743    | ,900    | ,416    | ,596    |
|                               | N               | 124     | 124    | 124     | 124     | 124     | 124     | 124     | 124     |
| ernaehrung_beschaeftigung     | Pearson corr.   | ,108    | ,135   | ,079    | ,088    | ,125    | ,052    | ,147    | -,077   |
|                               | Sign. (2-sided) | ,234    | ,136   | ,381    | ,330    | ,168    | ,563    | ,104    | ,395    |
|                               | N               | 124     | 124    | 124     | 124     | 124     | 124     | 124     | 124     |
| videorelevanz_gesamt          | Pearson corr.   | ,460**  | ,197*  | ,533**  | ,517**  | ,442**  | ,515**  | ,467**  | ,449**  |
|                               | Sign. (2-sided) | ,000    | ,028   | ,000    | ,000    | ,000    | ,000    | ,000    | ,000    |
|                               | N               | 124     | 124    | 124     | 124     | 124     | 124     | 124     | 124     |
| METI SCORE                    | Pearson corr.   | -,559** | -,153  | -,432** | -,431** | -,345** | -,403** | -,455** | -,566** |
|                               | Sign. (2-sided) | ,000    | ,089   | ,000    | ,000    | ,000    | ,000    | ,000    | ,000    |
|                               | N               | 124     | 124    | 124     | 124     | 124     | 124     | 124     | 124     |
| METI competence               | Pearson corr.   | -,642** | -,080  | -,438** | -,433** | -,366** | -,422** | -,509** | -,526** |
|                               | Sign. (2-sided) | ,000    | ,374   | ,000    | ,000    | ,000    | ,000    | ,000    | ,000    |
|                               | N               | 124     | 124    | 124     | 124     | 124     | 124     | 124     | 124     |
| METI integrity                | Pearson corr.   | -,446** | -,168  | -,353** | -,357** | -,300** | -,327** | -,373** | -,485** |
|                               | Sign. (2-sided) | ,000    | ,062   | ,000    | ,000    | ,001    | ,000    | ,000    | ,000    |
|                               | N               | 124     | 124    | 124     | 124     | 124     | 124     | 124     | 124     |
| METI benevolence              | Pearson corr.   | -,271** | -,194* | -,303** | -,303** | -,197*  | -,262** | -,234** | -,456** |
|                               | Sign. (2-sided) | ,002    | ,031   | ,001    | ,001    | ,029    | ,003    | ,009    | ,000    |
|                               | N               | 124     | 124    | 124     | 124     | 124     | 124     | 124     | 124     |
| ROS SCORE                     | Pearson corr.   | ,771**  | ,498** | ,461**  | ,303**  | ,439**  | ,301**  | ,344**  | ,406**  |
|                               | Sign. (2-sided) | ,000    | ,000   | ,000    | ,001    | ,000    | ,001    | ,000    | ,000    |
|                               | N               | 124     | 124    | 124     | 124     | 124     | 124     | 124     | 124     |
| ROS audience design           | Pearson corr.   | ,536**  | ,392** | ,366**  | ,206*   | ,354**  | ,212*   | ,246**  | ,313**  |
|                               | Sign. (2-sided) | ,000    | ,000   | ,000    | ,022    | ,000    | ,018    | ,006    | ,000    |
|                               | N               | 124     | 124    | 124     | 124     | 124     | 124     | 124     | 124     |
| ROS evaluation                | Pearson corr.   | 1       | ,160   | ,444**  | ,349**  | ,427**  | ,346**  | ,399**  | ,448**  |
|                               | Sign. (2-sided) |         | ,076   | ,000    | ,000    | ,000    | ,000    | ,000    | ,000    |
|                               | N               | 124     | 124    | 124     | 124     | 124     | 124     | 124     | 124     |
| ROS subj comprehension        | Pearson corr.   | ,160    | 1      | ,266**  | ,178*   | ,225*   | ,148    | ,146    | ,142    |
|                               | Sign. (2-sided) | ,076    |        | ,003    | ,048    | ,012    | ,102    | ,105    | ,115    |
|                               | N               | 124     | 124    | 124     | 124     | 124     | 124     | 124     | 124     |
| Coffee & Dementia Credibility | Pearson corr.   | ,444**  | ,266** | 1       | ,636**  | ,702**  | ,644**  | ,568**  | ,601**  |
|                               | Sign. (2-sided) | ,000    | ,003   |         | ,000    | ,000    | ,000    | ,000    | ,000    |
|                               | N               | 124     | 124    | 124     | 124     | 124     | 124     | 124     | 124     |
| Cola credibility              | Pearson corr.   | ,349**  | ,178*  | ,636**  | 1       | ,598**  | ,634**  | ,552**  | ,510**  |
|                               | Sign. (2-sided) | ,000    | ,048   | ,000    |         | ,000    | ,000    | ,000    | ,000    |

|                             |                 |        |       |        |        |        |        |        |        |
|-----------------------------|-----------------|--------|-------|--------|--------|--------|--------|--------|--------|
|                             | N               | 124    | 124   | 124    | 124    | 124    | 124    | 124    | 124    |
| Light Beverages credibility | Pearson corr.   | ,427** | ,225* | ,702** | ,598** | 1      | ,669** | ,617** | ,546** |
|                             | Sign. (2-sided) | ,000   | ,012  | ,000   | ,000   |        | ,000   | ,000   | ,000   |
|                             | N               | 124    | 124   | 124    | 124    | 124    | 124    | 124    | 124    |
| cancer credibility          | Pearson corr.   | ,346** | ,148  | ,644** | ,634** | ,669** | 1      | ,622** | ,591** |
|                             | Sign. (2-sided) | ,000   | ,102  | ,000   | ,000   | ,000   |        | ,000   | ,000   |
|                             | N               | 124    | 124   | 124    | 124    | 124    | 124    | 124    | 124    |
| Salt credibility            | Pearson corr.   | ,399** | ,146  | ,568** | ,552** | ,617** | ,622** | 1      | ,621** |
|                             | Sign. (2-sided) | ,000   | ,105  | ,000   | ,000   | ,000   | ,000   |        | ,000   |
|                             | N               | 124    | 124   | 124    | 124    | 124    | 124    | 124    | 124    |
| Eggs credibility            | Pearson corr.   | ,448** | ,142  | ,601** | ,510** | ,546** | ,591** | ,621** | 1      |
|                             | Sign. (2-sided) | ,000   | ,115  | ,000   | ,000   | ,000   | ,000   | ,000   |        |
|                             | N               | 124    | 124   | 124    | 124    | 124    | 124    | 124    | 124    |

\*\* . The correlation is for an alpha-niveau of 0,01 (2-sided) significant.

\* . The correlation is for an alpha-niveau of 0,05 (2-sided) significant.
